# Supplementary material for: Natural Phytocompounds from Common Indian Spices for Identification of Three Potential Inhibitors of Breast Cancer: A Molecular Modelling Approach
Source: MDPI journal article supplement (doi:10.3390/molecules27196590), 2022-10-05
Supplement: s1 [file s1]

Table S1: List of phytochemicals from five common Indian spices

| Sl.No                                       | Pubchem ID | Name of the phytocompounds   | Canonical SMILES                                                             |
|---------------------------------------------|------------|------------------------------|------------------------------------------------------------------------------|
| <b>1. <i>Zingiber officinale</i> Roscoe</b> |            |                              |                                                                              |
| 1                                           | 44559528   | (S)-6-Gingerol               | <chem>CCCCC(CC(=O)CCC1=CC(=C(C=C1)OC)O)O</chem>                              |
| 2                                           | 92139      | Alpha-curcumene              | <chem>CC1=CC=C(C=C1)C(C)CCC=C(C)C</chem>                                     |
| 3                                           | 7140311    | (+)-Angelicoidenol           | <chem>CC1(C2CC(C1(CC2O)C)O)C</chem>                                          |
| 4                                           | 442484     | Beta phellandrene            | <chem>CC(C)C1CCC(=C)C=C1</chem>                                              |
| 5                                           | 6552009    | (+)-Borneol                  | <chem>CC1(C2CCC1(C(C2)O)C)C</chem>                                           |
| 6                                           | 2758       | 1,8-Cineole                  | <chem>CC1(C2CCC(O1)(CC2)C)C</chem>                                           |
| 7                                           | 5318274    | [4]-Gingerdiol 3,5-diacetate | <chem>CCCC(CC(CCC1=CC(=C(C=C1)O)OC)OC(=O)C)OC(=O)C</chem>                    |
| 8                                           | 10987383   | 10-Epizonarene               | <chem>CC1CCC(=C2C1CCC(=C2)C)C(C)C</chem>                                     |
| 9                                           | 5317591    | 10-Gingerdione               | <chem>CCCCCCCCC(=O)C=C(CCC1=CC(=C(C=C1)O)OC)O</chem>                         |
| 10                                          | 442793     | 6-Gingerol                   | <chem>CCCCC(CC(=O)CCC1=CC(=C(C=C1)O)OC)O</chem>                              |
| 11                                          | 6442612    | 10-shogaol                   | <chem>CCCCCCCCC=CC(=O)CCC1=CC(=C(C=C1)O)OC</chem>                            |
| 12                                          | 86196540   | 12-Gingediol                 | <chem>CCCCCCCCCCCC(CC(CCC1=CC(=C(C=C1)O)OC)O)O</chem>                        |
| 13                                          | 5317599    | 12-Gingerol                  | <chem>CCCCCCCCCCCC(CC(=O)CCC1=CC(=C(C=C1)O)OC)O</chem>                       |
| 14                                          | 5317596    | 4-Gingerol                   | <chem>CCCC(CC(=O)CCC1=CC(=C(C=C1)O)OC)O</chem>                               |
| 15                                          | 11127403   | Alpha-Zingiberene            | <chem>CC1=CCC(C=C1)C(C)CCC=C(C)C</chem>                                      |
| 16                                          | 7462       | Alpha-Terpinene              | <chem>CC1=CC=C(CC1)C(C)C</chem>                                              |
| 17                                          | 17100      | Alpha-Terpineol              | <chem>CC1=CCC(CC1)C(C)(C)O</chem>                                            |
| 18                                          | 65575      | Alpha-Cedrol                 | <chem>CC1CCC2C13CCC(C(C3)C2(C)C)(C)O</chem>                                  |
| 19                                          | 19725      | Alpha-Copaene                | <chem>CC1=CCC2C3C1C2(CCC3C(C)C)C</chem>                                      |
| 20                                          | 442359     | Alpha-Cubebene               | <chem>CC1CCC(C2C13C2C(=CC3)C)C(C)C</chem>                                    |
| 21                                          | 5281516    | Alpha-Farnesene              | <chem>CC(=CCCC(=CCC=C(C)C=C)C)C</chem>                                       |
| 22                                          | 5280934    | Linolenic acid               | <chem>CCC=CCC=CCC=CCCCCCCCC(=O)O</chem>                                      |
| 23                                          | 7460       | Alpha Phellandrene           | <chem>CC1=CCC(C=C1)C(C)C</chem>                                              |
| 24                                          | 6654       | Alpha-Pinene                 | <chem>CC1=CCC2CC1C2(C)C</chem>                                               |
| 25                                          | 10856614   | Alpha Selinene               | <chem>CC1=CCCC2(C1CC(CC2)C(=C)C)C</chem>                                     |
| 26                                          | 853433     | Isoeugenol                   | <chem>CC=CC1=CC(=C(C=C1)O)OC</chem>                                          |
| 27                                          | 6918391    | Beta-Elemene                 | <chem>CC(=C)C1CCC(C(C1)C(=C)C)(C)C=C</chem>                                  |
| 28                                          | 222284     | Beta-sitosterol              | <chem>CCC(CCC(C)C1CCC2C1(CCC3C2CC=C4C3(CCC(C4)O)C)C)C(C)C</chem>             |
| 29                                          | 5280863    | Kaempferol                   | <chem>C1=CC(=CC=C1C2=C(C(=O)C3=C(C=C(C=C3O2)O)O)O)O</chem>                   |
| 30                                          | 969516     | Curcumin                     | <chem>COC1=C(C=CC(=C1)C=CC(=O)CC(=O)C=CC2=CC(=C(C=C2)O)OC)O</chem>           |
| <b>2. <i>Cuminum cyminum</i> L.</b>         |            |                              |                                                                              |
| 31                                          | 2758       | 1,8-Cineole                  | <chem>CC1(C2CCC(O1)(CC2)C)C</chem>                                           |
| 32                                          | 7460       | Alpha phellandrene           | <chem>CC1=CCC(C=C1)C(C)C</chem>                                              |
| 33                                          | 6654       | Alpha Pinene                 | <chem>CC1=CCC2CC1C2(C)C</chem>                                               |
| 34                                          | 5280704    | Apigetrin                    | <chem>C1=CC(=CC=C1C2=CC(=O)C3=C(C=C(C=C3O2)OC4C(C(C(C(O4)CO)O)O)O)O)O</chem> |
| 35                                          | 6918391    | Beta-Elemene                 | <chem>CC(=C)C1CCC(C(C1)C(=C)C)(C)C=C</chem>                                  |
| 36                                          | 222284     | Beta sitosterol              | <chem>CCC(CCC(C)C1CCC2C1(CCC3C2CC=C4C3(CCC(C4)O)C)C)C(C)C</chem>             |
| 37                                          | 10856614   | Alpha Selinene               | <chem>CC1=CCCC2(C1CC(CC2)C(=C)C)C</chem>                                     |
| 38                                          | 5280443    | Apigenin                     | <chem>C1=CC(=CC=C1C2=CC(=O)C3=C(C=C(C=C3O2)O)O)O</chem>                      |

|                           |          |                     |                                                                                        |
|---------------------------|----------|---------------------|----------------------------------------------------------------------------------------|
| 39                        | 5273469  | Benzyl cinnamate    | <chem>C1=CC=C(C=C1)COC(=O)C=CC2=CC=CC=C2</chem>                                        |
| 40                        | 10104370 | Beta-bisabolene     | <chem>CC1=CCC(CC1)C(=C)CCC=C(C)C</chem>                                                |
| 41                        | 5280489  | Beta Carotene       | <chem>CC1=C(C(CCC1)(C)C)C=CC(=CC=CC(=CC=CC=C(C)C=CC=C(C)C=CC2=C(CCCC2(C)C)C)C)C</chem> |
| 42                        | 17868    | Alpha-Thujene       | <chem>CC1=CCC2(C1C2)C(C)C</chem>                                                       |
| 43                        | 5281517  | Beta-farnesene      | <chem>CC(=CCCC(=CCCC(=C)C=C)C)C</chem>                                                 |
| 44                        | 442484   | Beta phellandrene   | <chem>CC(C)C1CCC(=C)C=C1</chem>                                                        |
| 45                        | 14896    | Beta-pinene         | <chem>CC1(C2CCC(=C)C1C2)C</chem>                                                       |
| 46                        | 31244    | Anisaldehyde        | <chem>COC1=CC=C(C=C1)C=O</chem>                                                        |
| 47                        | 66841    | Beta-terpinene      | <chem>CC(C)C1=CCC(=C)CC1</chem>                                                        |
| 48                        | 6448     | Bornyl acetate      | <chem>CC(=O)OC1CC2CCC1(C2(C)C)C</chem>                                                 |
| 49                        | 173183   | Campesterol         | <chem>CC(C)C(C)CCC(C)C1CCC2C1(CCC3C2CC=C4C3(CCC(C4)O)C)C</chem>                        |
| 50                        | 6616     | Camphene            | <chem>CC1(C2CCC(C2)C1=C)C</chem>                                                       |
| 51                        | 7438     | Carveol             | <chem>CC1=CCC(CC1O)C(=C)C</chem>                                                       |
| 52                        | 1742210  | Caryophyllene oxide | <chem>CC1(CC2C1CCC3(C(O3)CCC2=C)C)C</chem>                                             |
| 53                        | 5281515  | Caryophyllene       | <chem>CC1=CCCC(=C)C2CC(C2CC1)(C)C</chem>                                               |
| 54                        | 305      | Choline             | <chem>C[N+](C)(C)CCO</chem>                                                            |
| 55                        | 326      | Cuminaldehyde       | <chem>CC(C)C1=CC=C(C=C1)C=O</chem>                                                     |
| 56                        | 10820    | Cuminic acid        | <chem>CC(C)C1=CC=C(C=C1)C(=O)O</chem>                                                  |
| 57                        | 5280637  | Cynaroside          | <chem>C1=CC(=C(C=C1C2=CC(=O)C3=C(C=C(C=C3O2)OC4C(C(C(C(O4)CO)O)O)O)O)O)O</chem>        |
| 58                        | 3314     | Eugenol             | <chem>COC1=C(C=CC(=C1)CC=C)O</chem>                                                    |
| 59                        | 445070   | Farnesol            | <chem>CC(=CCCC(=CCCC(=CCO)C)C)C</chem>                                                 |
| 60                        | 5281522  | Isocaryophyllene    | <chem>CC1=CCCC(=C)C2CC(C2CC1)(C)C</chem>                                               |
| 61                        | 22311    | Limonene            | <chem>CC1=CCC(CC1)C(=C)C</chem>                                                        |
| 62                        | 6549     | Linalool            | <chem>CC(=CCCC(C)(C=C)O)C</chem>                                                       |
| 63                        | 5280445  | Luteolin            | <chem>C1=CC(=C(C=C1C2=CC(=O)C3=C(C=C(C=C3O2)O)O)O)O</chem>                             |
| 64                        | 31253    | Myrcene             | <chem>CC(=CCCC(=C)C=C)C</chem>                                                         |
| 65                        | 10582    | Myrtenol            | <chem>CC1(C2CC=C(C1C2)CO)C</chem>                                                      |
| 66                        | 938      | Niacin              | <chem>C1=CC(=CN=C1)C(=O)O</chem>                                                       |
| 67                        | 445639   | Oleic acid          | <chem>CCCCCCCCC=CCCCCCCCC(=O)O</chem>                                                  |
| 68                        | 7463     | P-cymene            | <chem>CC1=CC=C(C=C1)C(C)C</chem>                                                       |
| 69                        | 10247670 | Piperitol           | <chem>COC1=C(C=CC(=C1)C2C3COC(C3CO2)C4=CC5=C(C=C4)OCO5)O</chem>                        |
| 70                        | 6987     | Piperitone          | <chem>CC1=CC(=O)C(CC1)C(C)C</chem>                                                     |
| 71                        | 6989     | Thymol              | <chem>CC1=CC(=C(C=C1)C(C)C)O</chem>                                                    |
| <b>3. Piper nigrum L.</b> |          |                     |                                                                                        |
| 72                        | 22311    | Limonene            | <chem>CC1=CCC(CC1)C(=C)C</chem>                                                        |
| 73                        | 117443   | Cubebin             | <chem>C1C(C(C(O1)O)CC2=CC3=C(C=C2)OCO3)CC4=CC5=C(C=C4)OCO5</chem>                      |
| 74                        | 19725    | Alpha-Copaene       | <chem>CC1=CCC2C3C1C2(CCC3C(C)C)C</chem>                                                |

|     |           |                           |                                                                   |
|-----|-----------|---------------------------|-------------------------------------------------------------------|
| 75  | 5280450   | Linoleic acid             | <chem>CCCCC=CCC=CCCCCCCCC(=O)O</chem>                             |
| 76  | 32735     | Beta-pinone               | <chem>CC1(C2CCC(=O)C1C2)C</chem>                                  |
| 77  | 10467     | Arachidic acid            | <chem>CCCCCCCCCCCCCCCCCCCC(=O)O</chem>                            |
| 78  | 54670067  | Ascorbic acid             | <chem>C(C(C1C=C(C(=O)O1)O)O)O</chem>                              |
| 79  | 10104370  | Beta-bisabolene           | <chem>CC1=CCC(CC1)C(=C)CCC=C(C)C</chem>                           |
| 80  | 5281515   | Beta-caryophyllene        | <chem>CC1=CCCC(=C)C2CC(C2CC1)(C)C</chem>                          |
| 81  | 6918391   | Beta elemene              | <chem>CC(=C)C1CCC(C(C1)C(=C)C)(C)C=C</chem>                       |
| 82  | 14985     | Alpha tocopherol          | <chem>CC1=C(C2=C(CCC(O2)(C)CCCC(C)CCCC(C)CCCC(C)C(=C1O)C)C</chem> |
| 83  | 442393    | Beta-selinene             | <chem>CC(=C)C1CCC2(CCCC(=C)C2C1)C</chem>                          |
| 84  | 222284    | Beta sitosterol           | <chem>CCC(CCC(C)C1CCC2C1(CCC3C2CC=C4C3(CCC(C4)O)C)C)C(C)C</chem>  |
| 85  | 14350     | Epoxydihydrocaryophyllene | <chem>CC1(CC2C1CCC3(C(O3)CCC2=C)C)C</chem>                        |
| 86  | 5280863   | Kaempferol                | <chem>C1=CC(=CC=C1C2=C(C(=O)C3=C(C=C(C=C3O2)O)O)O)O</chem>        |
| 87  | 65575     | Alpha-Cedrol              | <chem>CC1CCC2C13CCC(C(C3)C2(C)C)(C)O</chem>                       |
| 88  | 638011    | Citral                    | <chem>CC(=CCCC(=CC=O)C)C</chem>                                   |
| 89  | 7794      | Citronellal               | <chem>CC(CCC=C(C)C)CC=O</chem>                                    |
| 90  | 129700027 | Citronellal acetate       | <chem>CC(CCC=C(C)C)CC(=O)OC(=O)C</chem>                           |
| 91  | 92780     | Cryptone                  | <chem>CC(C)C1CCC(=O)C=C1</chem>                                   |
| 92  | 441005    | Delta cadinene            | <chem>CC1=CC2C(CCC(=C2CC1)C)C(C)C</chem>                          |
| 93  | 518975    | Calamene                  | <chem>CC1CCC2=C(C=CC(=C2C1)C(C)C)C</chem>                         |
| 94  | 119       | GABA                      | <chem>C(CC(=O)O)CN</chem>                                         |
| 95  | 1549026   | Geranyl acetate           | <chem>CC(=CCCC(=CCOC(=O)C)C)C</chem>                              |
| 96  | 8438      | Heliotropine              | <chem>C1OC2=C(O1)C=C(C=C2)C=O</chem>                              |
| 97  | 94741     | Hentriacontan-16-one      | <chem>CCCCCCCCCCCCCCCCC(=O)CCCCCCCCCCCCCCCC</chem>                |
| 98  | 12410     | Hentriacontane            | <chem>CCCCCCCCCCCCCCCCCCCCCCCCCCCCCCCCCCCC</chem>                 |
| 99  | 68345     | Hentriacontanol           | <chem>CCCCCCCCCCCCCCCCCCCCCCCCCCCCCCCCCCCCO</chem>                |
| 100 | 170833    | Isopulegol                | <chem>CC1CCC(C(C1)O)C(=C)C</chem>                                 |
| 101 | 173183    | Campesterol               | <chem>CC(C)C(C)CCC(C)C1CCC2C1(CCC3C2CC=C4C3(CCC(C4)O)C)C</chem>   |
| 102 | 527428    | Limonene-4-ol             | <chem>CC1=CCC(CC1)(C(=C)C)O</chem>                                |
| 103 | 8294      | Linalyl acetate           | <chem>CC(=CCCC(C)(C=C)OC(=O)C)C</chem>                            |
| 104 | 55255958  | Methyl caffeic acid       | <chem>CC(=CC1=CC(=C(C=C1)O)O)C(=O)O</chem>                        |
| 105 | 637520    | Methyl cinnamate          | <chem>COC(=O)C=CC1=CC=CC=C1</chem>                                |
| 106 | 80790     | Methyl carvacrol          | <chem>CC1=C(C=C(C=C1)C(C)C)OC</chem>                              |
| 107 | 11493622  | Monoterpenes              | <chem>CC(=C(CCC(=CBr)C(=C)Cl)Br)C</chem>                          |
| 108 | 4276      | Myristicin                | <chem>COC1=CC(=CC2=C1OCO2)CC=C</chem>                             |
| 109 | 17429     | N-formylpiperidine        | <chem>C1CCN(CC1)C=O</chem>                                        |
| 110 | 5280343   | Quercetin                 | <chem>C1=CC(=C(C=C1C2=C(C(=O)C3=C(C=C(C=C3O2)O)O)O)O)O</chem>     |
| 111 | 25202482  | Sesquisabinene            | <chem>CC(CCC=C(C)C)C12CCC(=C)C1C2</chem>                          |
| 112 | 11230     | Terpinen-4-OL             | <chem>CC1=CCC(CC1)(C(C)C)O</chem>                                 |

|                                   |          |                         |                                                                                        |
|-----------------------------------|----------|-------------------------|----------------------------------------------------------------------------------------|
| <b>4. <i>Curcuma longa</i> L.</b> |          |                         |                                                                                        |
| 113                               | 2758     | 1,8-Cineole             | <chem>CC1(C2CCC(O1)(CC2)C)C</chem>                                                     |
| 114                               | 7460     | Alpha phellandrene      | <chem>CC1=CCC(C=C1)C(C)C</chem>                                                        |
| 115                               | 558221   | AR-Tumerone             | <chem>CC1=CC=C(C=C1)C(C)CC(=O)C=C(C)C</chem>                                           |
| 116                               | 7462     | Alpha terpinene         | <chem>CC1=CC=C(CC1)C(C)C</chem>                                                        |
| 117                               | 17100    | Alpha terpineol         | <chem>CC1=CCC(CC1)C(C)(C)O</chem>                                                      |
| 118                               | 14985    | Alpha tocopherol        | <chem>CC1=C(C2=C(CCC(O2)(C)CCCC(C)CCCC(C)CCCC(C)C)(=C1O)C)C</chem>                     |
| 119                               | 6654     | Alpha pinene            | <chem>CC1=CCC2CC1C2(C)C</chem>                                                         |
| 120                               | 222284   | Beta sitosterol         | <chem>CCC(CCC(C)C1CCC2C1(CCC3C2CC=C4C3(CCC(C4)O)C)C)C(C)C</chem>                       |
| 121                               | 444539   | Cinnamic acid           | <chem>C1=CC=C(C=C1)C=CC(=O)O</chem>                                                    |
| 122                               | 69879809 | Cyclocurcumin           | <chem>COC1=C(C=CC(=C1)C=CC2=CC(=O)CC(O2)C3=CC(=C(C=C3)O)OC)O</chem>                    |
| 123                               | 5469424  | Demethoxycurcumin       | <chem>COC1=C(C=CC(=C1)C=CC(=O)CC(=O)C=CC2=CC=C(C=C2)O)O</chem>                         |
| 124                               | 493570   | Riboflavin              | <chem>CC1=CC2=C(C=C1C)N(C3=NC(=O)NC(=O)C3=N2)CC(C(C(CO)O)O)O</chem>                    |
| 125                               | 3033866  | Bisabolene              | <chem>CC1=CCC(=C(C)CCC=C(C)C)CC1</chem>                                                |
| 126                               | 5315469  | Bisacumol               | <chem>CC1=CC=C(C=C1)C(C)CC(C=C(C)C)O</chem>                                            |
| 127                               | 14287397 | Bisacurone              | <chem>CC(CC(=O)C=C(C)C)C1CC(C(C=C1)(C)O)O</chem>                                       |
| 128                               | 6552009  | (+)-Borneol             | <chem>CC1(C2CCC1(C(C2)O)C)C</chem>                                                     |
| 129                               | 689043   | Caffeic acid            | <chem>C1=CC(=C(C=C1C=CC(=O)O)O)O</chem>                                                |
| 130                               | 637429   | Calebin-A               | <chem>COC1=C(C=CC(=C1)C=CC(=O)COC(=O)C=CC2=CC(=C(C=C2)O)OC)O</chem>                    |
| 131                               | 173183   | Campesterol             | <chem>CC(C)C(C)CCC(C)C1CCC2C1(CCC3C2CC=C4C3(CCC(C4)O)C)C</chem>                        |
| 132                               | 6616     | Camphene                | <chem>CC1(C2CCC(C2)C1=C)C</chem>                                                       |
| 133                               | 2537     | Camphor                 | <chem>CC1(C2CCC1(C(=O)C2)C)C</chem>                                                    |
| 134                               | 379      | Caprylic acid           | <chem>CCCCCCCC(=O)O</chem>                                                             |
| 135                               | 26049    | car-3-ene               | <chem>CC1=CCC2C(C1)C2(C)C</chem>                                                       |
| 136                               | 3081930  | Curzerenone             | <chem>CC1=COC2=C1C(=O)C(C(C2)(C)C=C)C(=C)C</chem>                                      |
| 137                               | 92139    | Alpha Curcumene         | <chem>CC1=CC=C(C=C1)C(C)CCC=C(C)C</chem>                                               |
| 138                               | 167812   | Curcumenol              | <chem>CC1CCC2C13CC(=C(C)C)C(O3)(C=C2C)O</chem>                                         |
| 139                               | 969516   | Curcumin                | <chem>COC1=C(C=CC(=C1)C=CC(=O)CC(=O)C=CC2=CC(=C(C=C2)O)OC)O</chem>                     |
| 140                               | 14240392 | Curcumol                | <chem>CC1CCC2C13CC(C(O3)(CC2=C)O)C(C)C</chem>                                          |
| 141                               | 6441391  | Curdione                | <chem>CC1CCC=C(CC(=O)C(CC1=O)C(C)C)C</chem>                                            |
| 142                               | 196216   | Curlone                 | <chem>CC(CC(=O)C=C(C)C)C1CCC(=C)C=C1</chem>                                            |
| 143                               | 5280489  | Beta-carotene           | <chem>CC1=C(C(CCC1)(C)C)C=CC(=CC=CC(=CC=CC=C(C)C=CC=C(C)C=CC2=C(CCCC2(C)C)C)C)C</chem> |
| 144                               | 12315492 | Beta-sesquiphellandrene | <chem>CC(CCC=C(C)C)C1CCC(=C)C=C1</chem>                                                |
| 145                               | 10104370 | Beta bisabolene         | <chem>CC1=CCC(CC1)C(=C)CCC=C(C)C</chem>                                                |
| 146                               | 3314     | Eugenol                 | <chem>COC1=C(C=CC(=C1)CC=C)O</chem>                                                    |
| 147                               | 9548705  | Germacrene              | <chem>CC1=CCCC(=CCC(CC1)C(=C)C)C</chem>                                                |

|                             |           |                              |                                                                             |
|-----------------------------|-----------|------------------------------|-----------------------------------------------------------------------------|
| 148                         | 460       | Guaiacol                     | <chem>COC1=CC=CC=C1O</chem>                                                 |
| 149                         | 9548703   | Guaiane                      | <chem>CC1CCC(CC2C1CCC2C)C(C)C</chem>                                        |
| 150                         | 22311     | Limonene                     | <chem>CC1=CCC(CC1)C(=C)C</chem>                                             |
| 151                         | 6549      | Linalool                     | <chem>CC(=CCCC(C)(C=C)O)C</chem>                                            |
| 152                         | 938       | Niacin                       | <chem>C1=CC(=CN=C1)C(=O)O</chem>                                            |
| 153                         | 637542    | P-Coumaric acid              | <chem>C1=CC(=CC=C1C=CC(=O)O)O</chem>                                        |
| 154                         | 8486      | Vanillic acid                | <chem>COC1=C(C=CC(=C1)C(=O)O)O</chem>                                       |
| 5. <i>Allium sativum</i> L. |           |                              |                                                                             |
| 155                         | 133337    | 2-vinyl-1,3-dithiine         | <chem>C=CC1SCC=CS1</chem>                                                   |
| 156                         | 444899    | Arachidonic acid             | <chem>CCCCC=CCC=CCC=CCC=CCCCC(=O)O</chem>                                   |
| 157                         | 94204     | 24-methylenecycloartanol     | <chem>CC(C)C(=C)CCC(C)C1CCC2(C1(CCC34C2CCC5C3(C4)CCC(C5(C)C)O)C)C</chem>    |
| 158                         | 5386591   | Ajoene                       | <chem>C=CCSSC=CCS(=O)CC=C</chem>                                            |
| 159                         | 65036     | Allicin                      | <chem>C=CCSS(=O)CC=C</chem>                                                 |
| 160                         | 87310     | Alliin                       | <chem>C=CCS(=O)CC(C(=O)O)N</chem>                                           |
| 161                         | 86374     | Allixin                      | <chem>CCCCC1=C(C(=O)C(=C(O1)C)OC)O</chem>                                   |
| 162                         | 21612418  | Allyl 2-propenethiosulfinate | <chem>C=CCOS(=S)CC=C</chem>                                                 |
| 163                         | 62434     | Allyl methyl disulfide       | <chem>CSSCC=C</chem>                                                        |
| 164                         | 129712276 | Allyl methyl thiosulfinate   | <chem>COS(=O)SCC=C</chem>                                                   |
| 165                         | 61926     | Allyl methyl trisulfide      | <chem>CSSSCC=C</chem>                                                       |
| 166                         | 5352855   | Allylpropenyl disulfide      | <chem>CC=CSSCC=C</chem>                                                     |
| 167                         | 7460      | Alpha phellandrene           | <chem>CC1=CCC(C=C1)C(C)C</chem>                                             |
| 168                         | 5280443   | Apigenin                     | <chem>C1=CC(=CC=C1C2=CC(=O)C3=C(C=C(C(=C3O2)O)O)O)O</chem>                  |
| 169                         | 10219489  | Vinyldithiin                 | <chem>C=CC1=CC=CSS1</chem>                                                  |
| 170                         | 5280863   | Kaempferol                   | <chem>C1=CC(=CC=C1C2=C(C(=O)C3=C(C=C(C(=C3O2)O)O)O)O)O</chem>               |
| 171                         | 10717615  | Beta chlorogenin             | <chem>CC1CCC2(C(C3C(O2)CC4C3(CCC5C4CC(C6C5(CCC(C6)O)C)O)C)C)OC1</chem>      |
| 172                         | 6444001   | Xyloglucan                   | <chem>COC1=C(C=CC(=C1)C=CC(=O)OC2COC(C(C2O)O)OCC(C(C(C(C=O)O)O)O)O)O</chem> |
| 173                         | 6857447   | Beta tocopherol              | <chem>CC1=CC(=C(C2=C1OC(CC2)(C)CCCC(C)CCCC(C)CCCC(C)C)O</chem>              |
| 174                         | 171548    | Biotin                       | <chem>C1C2C(C(S1)CCCCC(=O)O)NC(=O)N2</chem>                                 |
| 175                         | 689043    | Caffeic acid                 | <chem>C1=CC(=C(C=C1C=CC(=O)O)O)O</chem>                                     |
| 176                         | 1794427   | Chlorogenic acid             | <chem>C1C(C(C(CC1(C(=O)O)O)OC(=O)C=CC2=CC(=C(C=C2)O)O)O)O</chem>            |
| 177                         | 638011    | Citral                       | <chem>CC(=CCCC(=CC=O)C)C</chem>                                             |
| 178                         | 9750      | Citrulline                   | <chem>C(CC(C(=O)O)N)CNC(=O)N</chem>                                         |
| 179                         | 16590     | Diallyl disulfide            | <chem>C=CCSSCC=C</chem>                                                     |
| 180                         | 866       | Endolysin                    | <chem>C(CCN)CC(C(=O)O)N</chem>                                              |
| 181                         | 445858    | Ferulic acid                 | <chem>COC1=C(C=CC(=C1)C=CC(=O)O)O</chem>                                    |

|     |          |                  |                                                                              |
|-----|----------|------------------|------------------------------------------------------------------------------|
| 182 | 637566   | Geraniol         | <chem>CC(=CCCC(=CCO)C)C</chem>                                               |
| 183 | 5281166  | Jasmonic acid    | <chem>CCC=CCC1C(CCC1=O)CC(=O)O</chem>                                        |
| 184 | 801      | Auxin            | <chem>C1=CC=C2C(=C1)C(=CN2)CC(=O)O</chem>                                    |
| 185 | 5280450  | Linoleic acid    | <chem>CCCCC=CCC=CCCCCCCCC(=O)O</chem>                                        |
| 186 | 5280934  | Linolenic acid   | <chem>CCC=CCC=CCC=CCCCCCCCC(=O)O</chem>                                      |
| 187 | 11005    | Myristic acid    | <chem>CCCCCCCCCCCCC(=O)O</chem>                                              |
| 188 | 938      | Niacin           | <chem>C1=CC(=CN=C1)C(=O)O</chem>                                             |
| 189 | 10494    | Oleanolic acid   | <chem>CC1(CCC2(CCC3(C(=CCC4C3(CCC5C4(CCC(C5(C)C)O)C)C)C2C1)C)C(=O)O)C</chem> |
| 190 | 445639   | Oleic acid       | <chem>CCCCCCCCC=CCCCCCCCC(=O)O</chem>                                        |
| 191 | 6613     | Pantothenic acid | <chem>CC(C)(CO)C(C(=O)NCCC(=O)O)O</chem>                                     |
| 192 | 441476   | Pectin           | <chem>C1(C(C(OC(C1O)O)C(=O)O)O)O</chem>                                      |
| 193 | 5280343  | Quercetin        | <chem>C1=CC(=C(C=C1C2=C(C(=O)C3=C(C=C(C=C3O2)O)O)O)O)O</chem>                |
| 194 | 338      | Salicyclic acid  | <chem>C1=CC=C(C(=C1)C(=O)O)O</chem>                                          |
| 195 | 54670067 | Ascorbic acid    | <chem>C(C(C1C(=C(C(=O)O1)O)O)O)O</chem>                                      |
| 196 | 637775   | Sinapic acid     | <chem>COC1=CC(=CC(=C1O)OC)C=CC(=O)O</chem>                                   |
| 197 | 5280794  | Stigmasterol     | <chem>CCC(C=CC(C)C1CCC2C1(CCC3C2CC=C4C3(CCC(C4)O)C)C)C(C)C</chem>            |
| 198 | 1110     | Succinic acid    | <chem>C(CC(=O)O)C(=O)O</chem>                                                |
| 199 | 5570     | Trigonelline     | <chem>C[N+]1=CC=CC(=C1)C(=O)[O-]</chem>                                      |
| 200 | 8486     | Vanillic acid    | <chem>COC1=C(C=CC(=C1)C(=O)O)O</chem>                                        |

**\*Green colour indicates the presence of molecules in more than one plant species**

Table S2: Phytocompounds from five plants that overlapped

| Sl.No | Phytoconstituents  | <i>Zingiber officinale</i><br>Roscoe | <i>Cuminum</i><br><i>cuminum</i> L. | <i>Piper</i><br><i>nigrum</i> L. | <i>Curcuma</i><br><i>longa</i> L. | <i>Allium</i><br><i>sativum</i> L. |
|-------|--------------------|--------------------------------------|-------------------------------------|----------------------------------|-----------------------------------|------------------------------------|
| 1.    | Beta phellandrene  | +                                    | +                                   | -                                | -                                 | -                                  |
| 2.    | 1,8-Cineole        | +                                    | +                                   | -                                | +                                 | -                                  |
| 3.    | Alpha Curcumene    | +                                    | -                                   | -                                | +                                 | -                                  |
| 4.    | Alpha Terpinene    | +                                    | -                                   | -                                | +                                 | -                                  |
| 5.    | Alpha-Terpineol    | +                                    | -                                   | -                                | +                                 | -                                  |
| 6.    | Alpha Cedrol       | +                                    | -                                   | +                                | -                                 | -                                  |
| 7.    | Alpha Copaene      | +                                    | -                                   | +                                | -                                 | -                                  |
| 8.    | Linolenic acid     | +                                    | -                                   | -                                | -                                 | +                                  |
| 9.    | Alpha Phellandrene | +                                    | +                                   | -                                | +                                 | -                                  |
| 10.   | Alpha Pinene       | +                                    | +                                   | -                                | +                                 | -                                  |
| 11.   | Alpha-Selinene     | +                                    | +                                   | -                                | -                                 | -                                  |
| 12.   | Beta-Elemene       | +                                    | +                                   | +                                | -                                 | -                                  |
| 13.   | Beta-sitosterol    | +                                    | +                                   | +                                | +                                 | -                                  |
| 14.   | Kaempferol         | +                                    | -                                   | +                                | -                                 | +                                  |
| 15.   | Apigenin           | -                                    | +                                   | -                                | -                                 | +                                  |
| 16.   | Beta-bisabolene    | -                                    | +                                   | +                                | +                                 | --                                 |
| 17.   | Beta-Carotene      | -                                    | +                                   | -                                | +                                 | -                                  |
| 18.   | Campesterol        | -                                    | +                                   | +                                | +                                 | -                                  |
| 19.   | Camphene           | -                                    | +                                   | -                                | +                                 | -                                  |
| 20.   | Eugenol            | -                                    | +                                   | -                                | +                                 | -                                  |
| 21.   | Linalool           | -                                    | +                                   | -                                | +                                 | -                                  |
| 22.   | Limonene           | -                                    | +                                   | -                                | +                                 | -                                  |



|     |                  |   |   |   |   |   |
|-----|------------------|---|---|---|---|---|
| 23. | Niacin           |   | + |   | + | + |
| 24. | Oleic acid       | - | + | - | - | + |
| 25. | Citral           | - | - | + | - | + |
| 26. | Quercetin        | - | - | + | - | + |
| 27. | Caffeic acid     | - | - | - | + | + |
| 28. | Alpha tocopherol | - | - | + | + | - |
| 29. | Curcumin         | + | - | - | + | - |
| 30. | Vanillic acid    | - | - | - | + | + |

\*‘+’ = **present**; ‘-’= **absent**

Table S3: Binding energy scores calculated by iGEMDOCK 2.1 for 153 phytocompounds against CDK8, PR and EGFR target proteins

| Sl. No. | Name of the phytocompounds   | Target proteins    |                  |                    |
|---------|------------------------------|--------------------|------------------|--------------------|
|         |                              | CDK8<br>(Kcal/mol) | PR<br>(Kcal/mol) | EGFR<br>(Kcal/mol) |
| 1       | (S)-6-Gingerol               | -104.811           | -87.502          | -79.4371           |
| 2       | Ajoene                       | -77.5688           | -61.6849         | -57.9559           |
| 3       | Allicin                      | -57.9275           | -53.122          | -47.9418           |
| 4       | Alliin                       | -79.0241           | -62.0727         | -59.6716           |
| 5       | Allixin                      | -92.5369           | -74.6788         | -65.9877           |
| 6       | Allyl methyl disulfide       | -41.1782           | -33.8852         | -33.8556           |
| 7       | Allyl 2-propenethiosulfinate | -56.8218           | -46.6457         | -46.7505           |
| 8       | Alpha-Cedrol                 | -70.5328           | -72.6062         | -60.5928           |
| 9       | Alpha-Copaene                | -67.1359           | -58.6649         | -55.7061           |
| 10      | Alpha-Cubebene               | -75.6275           | -65.1254         | -63.1143           |
| 11      | Alpha-Curcumene              | -85.0609           | -63.6133         | -63.0109           |
| 12      | Alpha-Farnesene              | -78.0516           | -59.6599         | -61.8937           |
| 13      | Linoleic acid                | -100.737           | -83.4394         | -74.7183           |
| 14      | Alpha-phellandrene           | -57.3464           | -46.7841         | -48.7804           |
| 15      | Alpha-pinene                 | -52.1852           | -43.4731         | -46.1632           |
| 16      | Alpha-Selinene               | -71.5675           | -59.8168         | -58.052            |
| 17      | Alpha-tocopherol             | -105.456           | -91.8344         | -98.4352           |
| 18      | Alpha-Terpinene              | -57.7403           | -47.9462         | -47.4883           |
| 19      | Alpha-Terpineol              | -57.6343           | -49.4668         | -47.313            |
| 20      | Alpha-Thujene                | -56.144            | -47.0616         | -48.4233           |
| 21      | Alpha-Zingiberene            | -78.696            | -63.848          | -66.4751           |

|    |                         |                 |                 |                 |
|----|-------------------------|-----------------|-----------------|-----------------|
| 22 | (+)-Angelicoidenol      | -55.4782        | -60.2741        | -54.1794        |
| 23 | Anisaldehyde            | -58.5142        | -49.6015        | -46.8539        |
| 24 | Apigenin                | -108.658        | -83.1673        | -84.6763        |
| 25 | <b>Apigetrin</b>        | <b>-139.527</b> | <b>-123.298</b> | <b>-105.185</b> |
| 26 | Arachidic acid          | -109.896        | -87.6715        | -70.9994        |
| 27 | Arachidonic acid        | -111.35         | -85.6796        | -70.0136        |
| 28 | AR-Tumerone             | -86.7863        | -77.2265        | -68.2934        |
| 29 | Ascorbic acid           | -76.57          | -67.4633        | -71.5339        |
| 30 | Auxin                   | -79.98          | -68.76          | -66.4178        |
| 31 | Benzyl cinnamate        | -99.3954        | -76.6976        | -72.5332        |
| 32 | Beta-bisabolene         | -81.1788        | -67.1087        | -61.7078        |
| 33 | Beta-Carotene           | -82.9778        | -88.2893        | -73.8559        |
| 34 | Beta-caryophyllene      | -72.4668        | -60.059         | -52.9973        |
| 35 | Beta-chlorogenin        | -93.6201        | -98.4622        | -88.2104        |
| 36 | Beta-Elemene            | -71.0103        | -60.6097        | -58.9066        |
| 37 | Beta-farnesene          | -83.9071        | -64.6652        | -65.4269        |
| 38 | Beta-phellandrene       | -56.1826        | -49.1959        | -46.6697        |
| 39 | Beta-pinene             | -49.5787        | -41.7821        | -46.3293        |
| 40 | Beta-pinone             | -52.7776        | -47.2897        | -43.6499        |
| 41 | Beta-selinene           | -69.903         | -60.197         | -53.9192        |
| 42 | Beta-sesquiphellandrene | -82.1178        | -63.5428        | -61.1558        |
| 43 | Beta-sitosterol         | -89.7443        | -95.3916        | -85.3261        |
| 44 | Beta-terpinene          | -58.5214        | -49.5633        | -46.815         |
| 45 | Beta-tocopherol         | -107.359        | -96.1963        | -94.4317        |
| 46 | Biotin                  | -95.4029        | -79.8656        | -68.6381        |

|    |                     |          |          |          |
|----|---------------------|----------|----------|----------|
| 47 | Bisabolene          | -81.5005 | -65.0422 | -61.529  |
| 48 | Bisacumol           | -84.4979 | -78.2668 | -66.2708 |
| 49 | Bisacurone          | -88.3776 | -74.1271 | -74.2656 |
| 50 | (+)-Borneol         | -51.2928 | -47.516  | -47.0786 |
| 51 | Bornyl acetate      | -69.0387 | -65.1623 | -57.0787 |
| 52 | Caffeic acid        | -86.3691 | -66.4419 | -71.8763 |
| 53 | Calamene            | -76.7772 | -65.5655 | -53.3784 |
| 54 | Calebin-A           | -129.381 | -100.878 | -94.3753 |
| 55 | Campesterol         | -92.3234 | -93.6405 | -84.8295 |
| 56 | Camphene            | -53.4427 | -44.5433 | -43.2975 |
| 57 | Camphor             | -54.4404 | -46.4857 | -44.3376 |
| 58 | Caprylic acid       | -69.7488 | -62.1456 | -54.2471 |
| 59 | Car-3-ene           | -52.8143 | -47.463  | -44.3274 |
| 60 | Carveol             | -64.5833 | -59.9786 | -56.6835 |
| 61 | Caryophyllene       | -74.4742 | -61.8815 | -51.2548 |
| 62 | Caryophyllene oxide | -69.5605 | -62.9912 | -52.8001 |
| 63 | Chlorogenic acid    | -131.947 | -103.578 | -97.3944 |
| 64 | Choline             | -49.9443 | -46.7654 | -42.3954 |
| 65 | 1,8-Cineole         | -51.2648 | -46.1637 | -46.0929 |
| 66 | Cinnamic acid       | -73.4787 | -65.5802 | -53.5436 |
| 67 | Citral              | -70.8019 | -55.9028 | -55.5976 |
| 68 | Citronellal         | -69.9755 | -57.7379 | -53.4255 |
| 69 | Citronellal acetate | -91.5807 | -72.5183 | -67.8081 |
| 70 | Citrulline          | -80.3157 | -75.4111 | -72.908  |
| 71 | Cryptone            | -60.563  | -52.032  | -51.7645 |

|    |                           |                 |                 |                |
|----|---------------------------|-----------------|-----------------|----------------|
| 72 | Cubebin                   | -120.885        | -95.1669        | -97.0883       |
| 73 | Cuminaldehyde             | -68.7815        | -56.0776        | -51.3361       |
| 74 | Cuminic acid              | -75.501         | -66.0935        | -53.4807       |
| 75 | Curcumenol                | -83.6496        | -61.9687        | -60.6331       |
| 76 | <b>Curcumin</b>           | <b>-138.149</b> | -104.672        | -92.0263       |
| 77 | Curcumol                  | -71.896         | -62.702         | -60.4566       |
| 78 | Curdione                  | -88.4717        | -73.0049        | -62.0358       |
| 79 | Curlone                   | -81.0765        | -62.6684        | -67.1518       |
| 80 | Curzerenone               | -84.682         | -66.6172        | -64.787        |
| 81 | Cyclocurcumin             | -103.688        | -99.2554        | -90.4457       |
| 82 | <b>Cynaroside</b>         | <b>-149.66</b>  | <b>-118.635</b> | <b>-119.18</b> |
| 83 | Delta cadinene            | -76.1382        | -62.5963        | -57.9843       |
| 84 | Demethoxycurcumin         | -135.487        | -90.3546        | -89.2974       |
| 85 | Diallyl disulfide         | -53.9619        | -41.4064        | -42.693        |
| 86 | Allylpropenyl disulfide   | -54.8037        | -43.6927        | -41.5715       |
| 87 | Endolysin                 | -70.059         | -62.131         | -61.8917       |
| 88 | Epoxydihydrocaryophyllene | -78.5064        | -69.4549        | -62.2397       |
| 89 | Eugenol                   | -73.7118        | -67.2077        | -67.4335       |
| 90 | Farnesol                  | -91.6988        | -77.0437        | -71.5401       |
| 91 | Ferulic acid              | -84.903         | -68.4163        | -71.4099       |
| 92 | 4-Gingerol                | -114.815        | -80.2474        | -82.3321       |
| 93 | GABA                      | -54.2399        | -51.6452        | -47.2442       |
| 94 | Geraniol                  | -72.9381        | -58.9384        | -58.5798       |
| 95 | Geranyl acetate           | -78.0023        | -65.0232        | -68.7127       |
| 96 | Germacrene                | -69.9808        | -61.0217        | -55.9958       |

|     |                              |          |          |          |
|-----|------------------------------|----------|----------|----------|
| 97  | [4]-Gingerdiol 3,5-diacetate | -113.397 | -94.2363 | -90.7951 |
| 98  | Guaiacol                     | -66.3319 | -57.0343 | -57.025  |
| 99  | Guaiane                      | -76.2387 | -64.8616 | -57.7937 |
| 100 | Heliotropine                 | -66.8737 | -60.3206 | -57.6926 |
| 101 | Hentriacontane               | -93.2908 | -86.1348 | -73.1799 |
| 102 | Hentriacontanol              | -117.809 | -96.9005 | -79.6905 |
| 103 | Hentriacontan-16-one         | -99.2657 | -85.8104 | -81.8618 |
| 104 | Isocaryophyllene             | -75.4924 | -61.8225 | -51.5789 |
| 105 | Isoeugenol                   | -77.4084 | -65.8263 | -63.5447 |
| 106 | Isopulegol                   | -64.4883 | -55.1258 | -53.9236 |
| 107 | Jasmonic acid                | -89.2523 | -61.4375 | -65.7346 |
| 108 | Kaempferol                   | -110.289 | -93.179  | -90.3149 |
| 109 | Limonene                     | -57.8777 | -49.3616 | -45.6744 |
| 110 | Limonene-4-ol                | -59.8066 | -57.2934 | -50.5973 |
| 111 | Linalool                     | -67.6877 | -57.4475 | -51.9731 |
| 112 | Linalyl acetate              | -80.4871 | -68.0118 | -58.5329 |
| 113 | Linolenic acid               | -118.295 | -92.2788 | -74.7183 |
| 114 | Luteolin                     | -108.428 | -87.536  | -92.6124 |
| 115 | Methyl caffeic acid          | -92.8714 | -68.8333 | -73.6634 |
| 116 | Methyl carvacrol             | -65.5959 | -61.5457 | -54.0494 |
| 117 | Methyl cinnamate             | -80.11   | -58.8759 | -58.1837 |
| 118 | 24-methylenecycloartanol     | -107.072 | -100.311 | -99.4798 |
| 119 | Monoterpenes                 | -70.6298 | -51.8586 | -53.7995 |
| 120 | Myrcene                      | -61.2095 | -52.464  | -48.5424 |
| 121 | Myrisitic acid               | -103.862 | -76.2692 | -64.9643 |

|     |                            |          |          |          |
|-----|----------------------------|----------|----------|----------|
| 122 | Myristicin                 | -78.1526 | -67.2257 | -57.1693 |
| 123 | Myrtenol                   | -60.9135 | -56.8281 | -53.0415 |
| 124 | N-formylpiperidine         | -53.2442 | -44.8131 | -45.3401 |
| 125 | Niacin                     | -66.5919 | -51.1668 | -53.8382 |
| 126 | Oleanolic acid             | -109.046 | -99.1252 | -75.828  |
| 127 | Oleic acid                 | -106.257 | -88.9538 | -75.5984 |
| 128 | Pantothenic acid           | -88.2894 | -80.2365 | -75.9183 |
| 129 | P-cymene                   | -57.1533 | -49.0912 | -47.3159 |
| 130 | Pectin                     | -83.04   | -69.6256 | -67.4675 |
| 131 | Piperitol                  | -106.28  | -90.9885 | -96.8025 |
| 132 | Piperitone                 | -61.9344 | -54.3268 | -96.8025 |
| 133 | Quercetin                  | -113.226 | -86.9838 | -91.5963 |
| 134 | Riboflavin                 | -129.65  | -104.237 | -100.923 |
| 135 | Salicyclic acid            | -74.8269 | -64.1135 | -60.2876 |
| 136 | Sesquibabinene             | -82.8085 | -62.5643 | -61.1352 |
| 137 | 6-Gingerol                 | -99.1522 | -87.4194 | -84.6827 |
| 138 | Stigmasterol               | -102.506 | -112.951 | -90.5877 |
| 139 | Succinic acid              | -70.6602 | -56.2248 | -49.2229 |
| 140 | Allyl methyl thiosulfinate | -53.39   | -49.8601 | -44.7704 |
| 141 | 10-Epizonarene             | -78.6916 | -62.7661 | -53.7485 |
| 142 | 10-Gingerdione             | -123.636 | -92.2556 | -91.8284 |
| 143 | 10-shogaol                 | -122.044 | -92.496  | -91.4592 |
| 144 | Terpinen-4-ol              | -60.5644 | -51.5869 | -49.8435 |
| 145 | Thymol                     | -64.2775 | -55.8671 | -58.7873 |
| 146 | Allyl methyl trisulfide    | -48.1138 | -38.3366 | -37.7196 |

|     |                      |          |                 |                 |
|-----|----------------------|----------|-----------------|-----------------|
| 147 | Trigonelline         | -66.0554 | -52.8032        | -56.3241        |
| 148 | 12-Gingediol         | -110.973 | -91.7979        | -87.4242        |
| 149 | 12-Gingerol          | -120.553 | -97.8895        | -87.0361        |
| 150 | 2-vinyl-1,3-dithiine | -47.2528 | -41.8305        | -42.4637        |
| 151 | Vanillic acid        | -77.6887 | -69.4284        | -69.8352        |
| 152 | Vinyldithiin         | -49.5499 | -42.1021        | -41.6892        |
| 153 | <b>Xyloglucan</b>    | -111.862 | <b>-113.788</b> | <b>-105.106</b> |
